# Supplementary material for: Rapid Generation and Analysis of a Barley Doubled Haploid Line with Higher Nitrogen Use Efficiency Than Parental Lines by F1 Microspore Embryogenesis
Source: MDPI journal article supplement (doi:10.3390/plants10081588), 2021-08-01
Supplement: s1 [file s1]

**Table S1:** RNA integrity number of samples used for sequencing

| Name      | Total quantity (µg) | OD260/280 | OD260/230 | RIN value |
|-----------|---------------------|-----------|-----------|-----------|
| CK BI04-1 | 4.285               | 1.978     | 1.824     | 7.5       |
| CK BI04-2 | 4.108               | 2.055     | 1.852     | 6.9       |
| CK BI04-3 | 4.990               | 2.072     | 1.891     | 7.7       |
| CK BI28-1 | 5.471               | 2.066     | 2.157     | 7.2       |
| CK BI28-2 | 5.911               | 2.071     | 1.926     | 7.2       |
| CK BI28-3 | 5.018               | 2.074     | 1.853     | 6.9       |
| CK DH45-1 | 13.553              | 2.100     | 1.815     | 6.8       |
| CK DH45-2 | 7.114               | 2.078     | 2.205     | 7.2       |
| CK DH45-3 | 4.787               | 2.025     | 1.838     | 7.4       |
| LN BI04-1 | 5.182               | 2.089     | 1.891     | 7.5       |
| LN BI04-2 | 3.958               | 2.048     | 1.826     | 7.1       |
| LN BI04-3 | 6.409               | 2.073     | 1.876     | 6.9       |
| LN BI28-1 | 9.298               | 2.086     | 2.196     | 8.4       |
| LN BI28-2 | 5.209               | 2.064     | 2.114     | 7.4       |
| LN BI28-3 | 3.217               | 2.031     | 1.879     | 7.6       |
| LN DH45-1 | 1.560               | 2.062     | 1.899     | 7.1       |
| LN DH45-2 | 3.513               | 2.019     | 1.871     | 7.4       |
| LN DH45-3 | 5.685               | 2.076     | 1.979     | 7.3       |

**Table S2:** Summary of quality control for RNA-Seq data

| Sample   | Total raw reads<br>No. | Total clean reads<br>No. | N(%)     | Q20 (%) | Q30(%) | Clean<br>Reads % |
|----------|------------------------|--------------------------|----------|---------|--------|------------------|
| CK BI-04 | 136,345,154            | 135,624,126              | 0.001613 | 97.02   | 92.74  | 99.47            |
| CK BI-28 | 127,995,806            | 127,447,370              | 0.000959 | 97.35   | 93.46  | 99.57            |
| CK DH45  | 132,055,610            | 131,105,758              | 0.002032 | 96.45   | 91.50  | 99.29            |
| LN BI-04 | 130,560,670            | 129,487,894              | 0.002811 | 96.04   | 90.63  | 99.18            |
| LN BI-28 | 121,972,182            | 121,122,070              | 0.00304  | 96.34   | 91.22  | 99.30            |
| LN DH45  | 137,467,718            | 136,336,736              | 0.002581 | 96.07   | 90.66  | 99.17            |

CK means the N level with 7.5mmol·L<sup>-1</sup>; LN means the N level with 0.75mmol·L<sup>-1</sup>; Total Raw Reads: The number of reads before filtering; Total Clean Reads: Filtered reads; N (%): The percentage of ambiguous bases; Q20 (%): The percentage of bases whose recognition accuracy is above 99%; Q30 (%): The percentage of bases whose recognition accuracy is above 99.9%; Clean Reads Ratio (%): The proportion of filtered reads.

**Table S3:** Summary of mapped events for clean reads

| Sample    | Map_Events | Mapped_to_Gene     | Mapped_to_InterGene | Mapped to Exon     |
|-----------|------------|--------------------|---------------------|--------------------|
| CK BI04-1 | 33,888,898 | 32,260,807(95.20%) | 1,628,091(4.80%)    | 31,989,644(99.16%) |
| CK BI04-2 | 35,867,807 | 34,236,826(95.45%) | 1,630,981(4.55%)    | 33,980,017(99.25%) |
| CK BI04-3 | 35,526,589 | 33,814,162(95.18%) | 1,712,427(4.82%)    | 33,551,714(99.22%) |
| CK BI28-1 | 34,065,923 | 32,335,504(94.92%) | 1,730,419(5.08%)    | 32,069,746(99.18%) |
| CK BI28-2 | 32,189,874 | 30,539,458(94.87%) | 1,650,416(5.13%)    | 30,277,962(99.14%) |
| CK BI28-3 | 32,613,411 | 30,829,754(94.53%) | 1,783,657(5.47%)    | 30,536,466(99.05%) |
| CK DH45-1 | 31,369,781 | 30,002,095(95.64%) | 1,367,686(4.36%)    | 29,781,854(99.27%) |
| CK DH45-2 | 33,545,207 | 31,994,554(95.38%) | 1,550,653(4.62%)    | 31,758,179(99.26%) |
| CK DH45-3 | 34,537,693 | 32,724,680(94.75%) | 1,813,013(5.25%)    | 32,454,572(99.17%) |
| LN BI04-1 | 30,439,496 | 28,962,068(95.15%) | 1,477,428(4.85%)    | 28,707,006(99.12%) |
| LN BI04-2 | 34,571,444 | 32,766,357(94.78%) | 1,805,087(5.22%)    | 32,431,898(98.98%) |
| LN BI04-3 | 32,330,526 | 30,505,288(94.35%) | 1,825,238(5.65%)    | 30,172,115(98.91%) |
| LN BI28-1 | 30,767,263 | 29,221,279(94.98%) | 1,545,984(5.02%)    | 28,978,494(99.17%) |
| LN BI28-2 | 30,768,681 | 29,250,460(95.07%) | 1,518,221(4.93%)    | 28,972,412(99.05%) |
| LN BI28-3 | 29,072,572 | 27,583,938(94.88%) | 1,488,634(5.12%)    | 27,356,699(99.18%) |
| LN DH45-1 | 33,556,455 | 31,915,988(95.11%) | 1,640,467(4.89%)    | 31,698,210(99.32%) |
| LN DH45-2 | 34,878,170 | 33,173,687(95.11%) | 1,704,483(4.89%)    | 32,917,244(99.23%) |
| LN DH45-3 | 33,580,138 | 32,051,766(95.45%) | 1,528,372(4.55%)    | 31,854,734(99.39%) |

**Table S4:** Primer information for qRT-PCR assay

| Gene ID                 | Forward primer<br>(5'-3') | Reverse primer<br>(3'-5') |
|-------------------------|---------------------------|---------------------------|
| <i>HvActin</i>          | GCTGACCGTATGAGCAAGGA      | GGAAAGTGCTGAGTGAGGCT      |
| <i>HvGAPDH</i>          | AGATGCCCCTATGTTTGTGG      | GGTCTTCTGTGTGGCAGTGA      |
| <i>HORVU3Hr1G066090</i> | GGAGATGCACAAGGACAGCT      | GTAGAAGTACTGCGCGACGA      |
| <i>HORVU4Hr1G061100</i> | CACCAACGCATAGACAATGG      | CAAACAAAACCTCCCCTTCCA     |
| <i>HORVU3Hr1G073220</i> | CTGCAACTCGTGGACTGGAT      | AGTAGGGTTGTGGGCACATG      |
| <i>HORVU0Hr1G017370</i> | GCGGATCAAGAATGTTTCGGC     | TCAAGCCCGTGAAGGAGAAC      |
| <i>HORVU6Hr1G003470</i> | TCCCACTGAGGAACAATGGC      | TGGCATCCCTCTCTGGATCA      |
| <i>HORVU4Hr1G054060</i> | CATTGGCGAAGAGTGGGTCT      | TTCCACGGACAAGCTCCATC      |
| <i>HORVU4Hr1G066860</i> | AACCTCAACCTCAGCGACTG      | GTCGTAGTTCCACTTGGGCA      |
| <i>HORVU4Hr1G007610</i> | GGATGGACGTCAGGAGCAAA      | AGGATGACTTCGCTGTCGTC      |

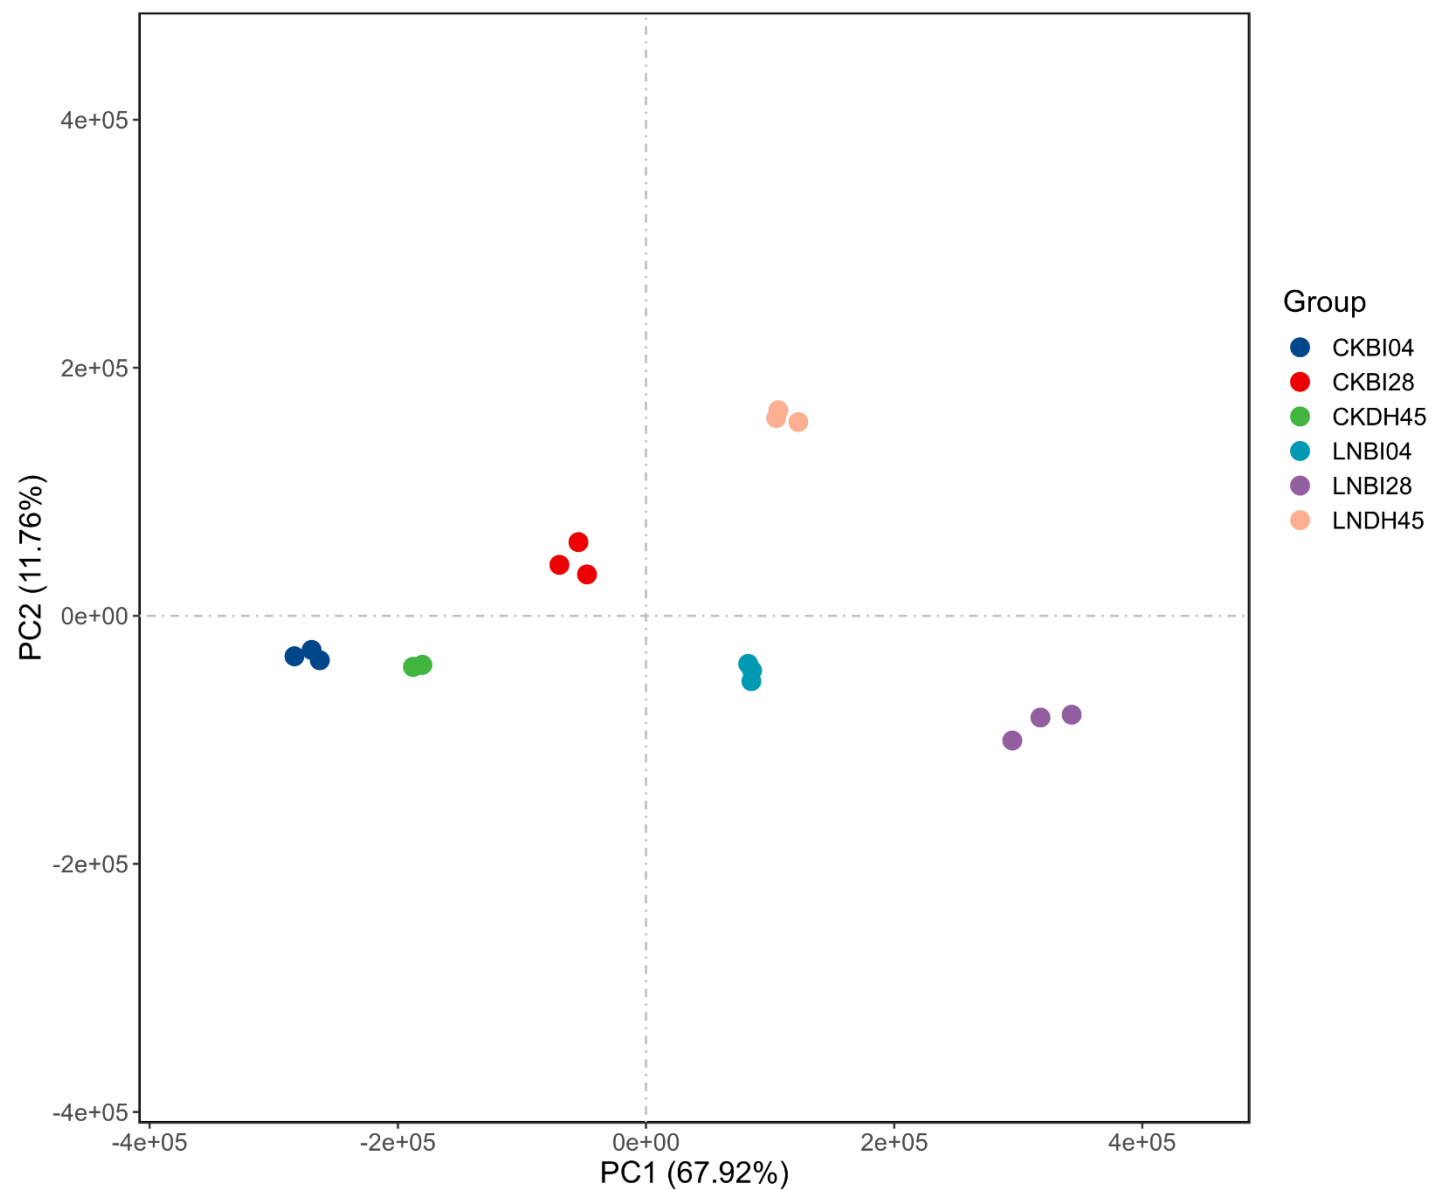

**Figure S1:** Principal component analysis (PCA) analysis of the samples based on gene counts

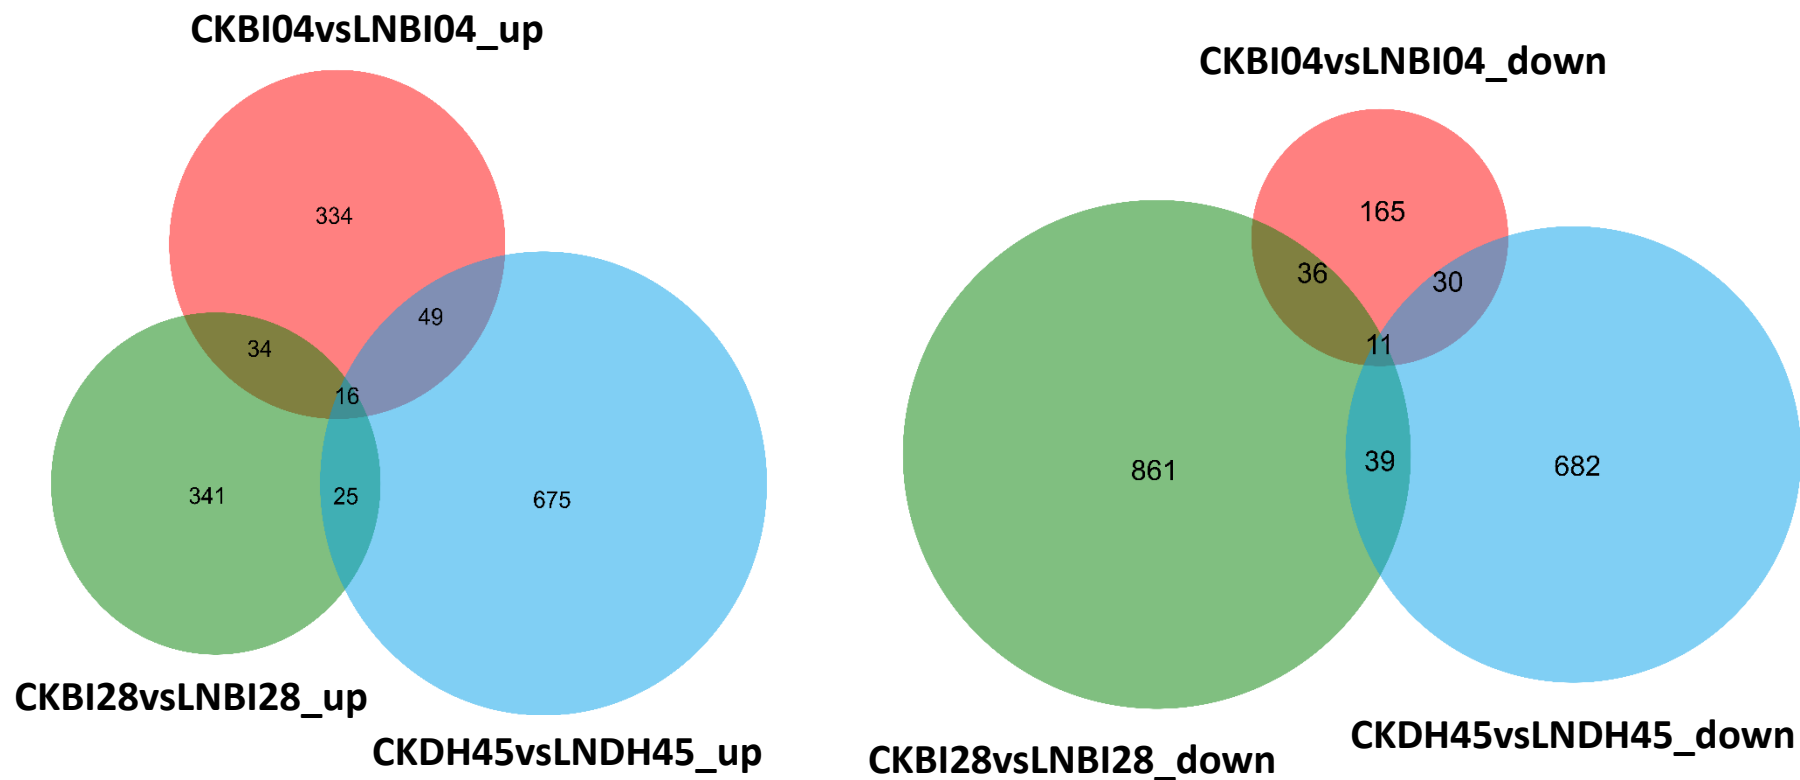

**Figure S2:** Up-and down-regulated differentially expression genes betweenDH45 and parents
